# Supplementary material for: Band-gap-tunable carbon quantum dots for surface-enhanced Raman scattering
Source: Research Square preprint supplement (doi:10.21203/rs.3.rs-5962648/v1), 2025-02-13
Supplement: Supplementary file 1 [file 62375b7e8d0cf3d945ff0b6d.docx]

**Supplementary information**

**Band-gap-tunable carbon quantum dots for surface-enhanced Raman scattering**

Menglin Ning1#, Zhuohan Jing1#, Haolin Chen2#, Kaili Xie1, Yu Su1, Jiaqi Liu1, Dantong Shen2, Jieyi Chen1, Biwen Yang1, Zhouyi Guo1, Bo Xu2 and Zhiming Liu1*

1 MOE Key Laboratory of Laser Life Science & Guangdong Provincial Key Laboratory of Laser Life Science, College of Biophotonics, School of Optoelectronic Science and Engineering, South China Normal University, Guangzhou 510631, PR China

2 Department of Anesthesiology, General Hospital of Southern Theater Command of People’s Liberation Army, Guangzhou 510010, China

# These authors contributed equally to this work.

* Corresponding author:

E-mail addresses: liuzm021@126.com (Z. Liu)


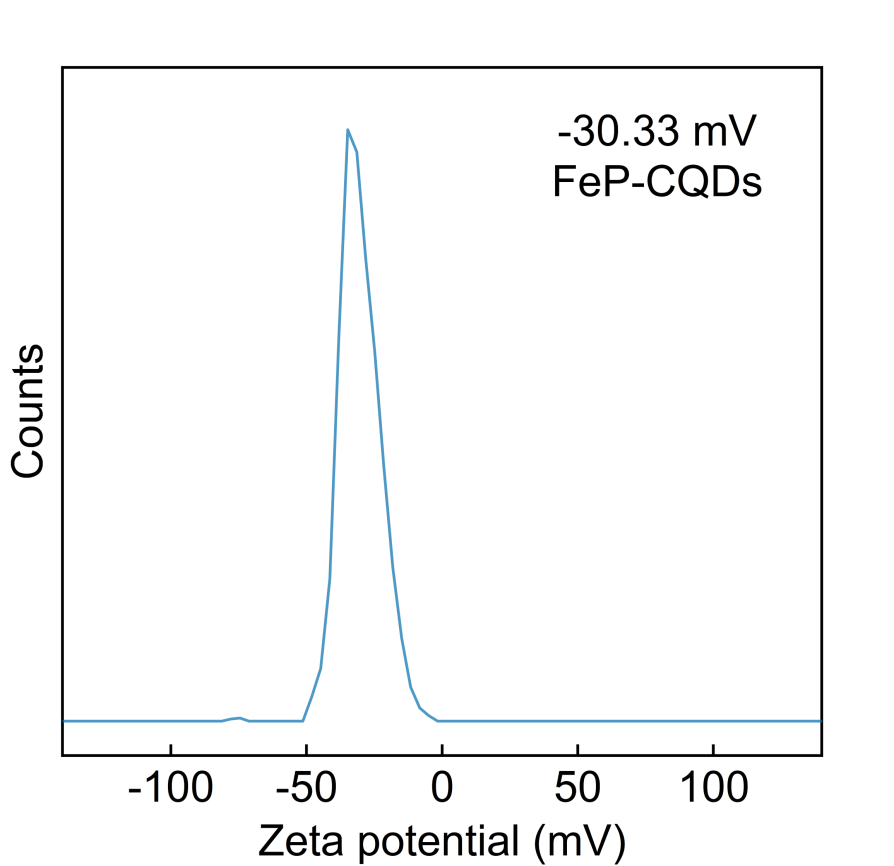


**Fig. S1 The zeta potential of FeP-CQDs.**


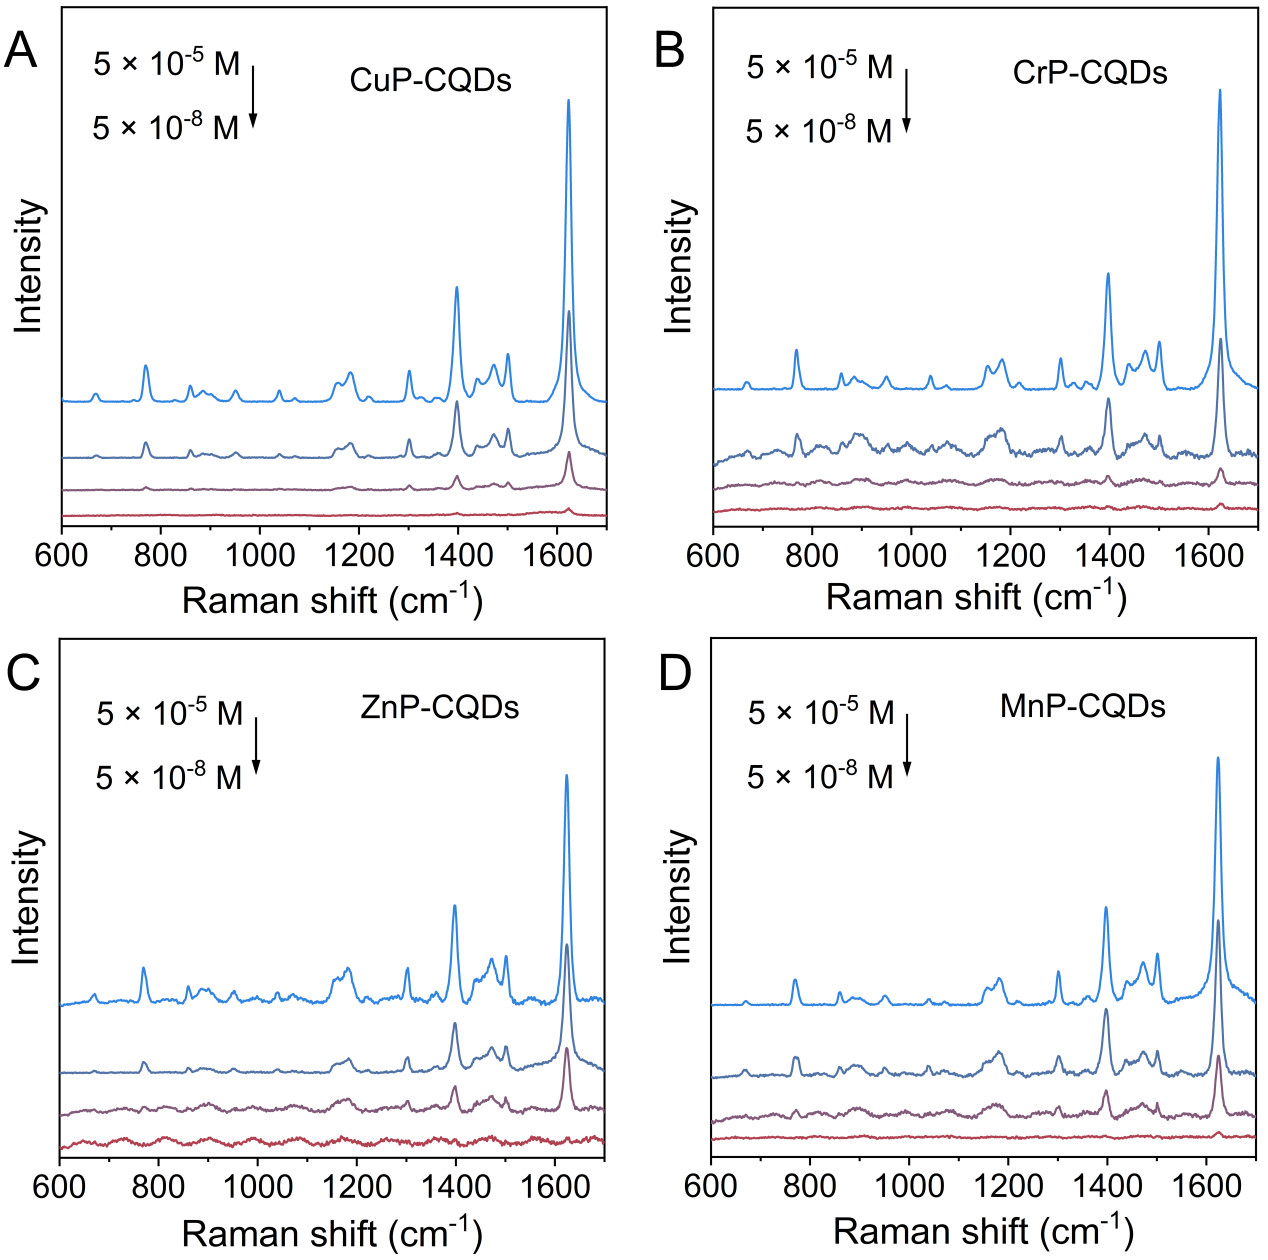


**Fig. S2 SERS performance of other MPN-CQDs under 633 nm laser excitation.** (A) CuP-CQDs, (B) CrP-CQDs, (C) ZnP-CQDs, and (D) MnP-CQDs.


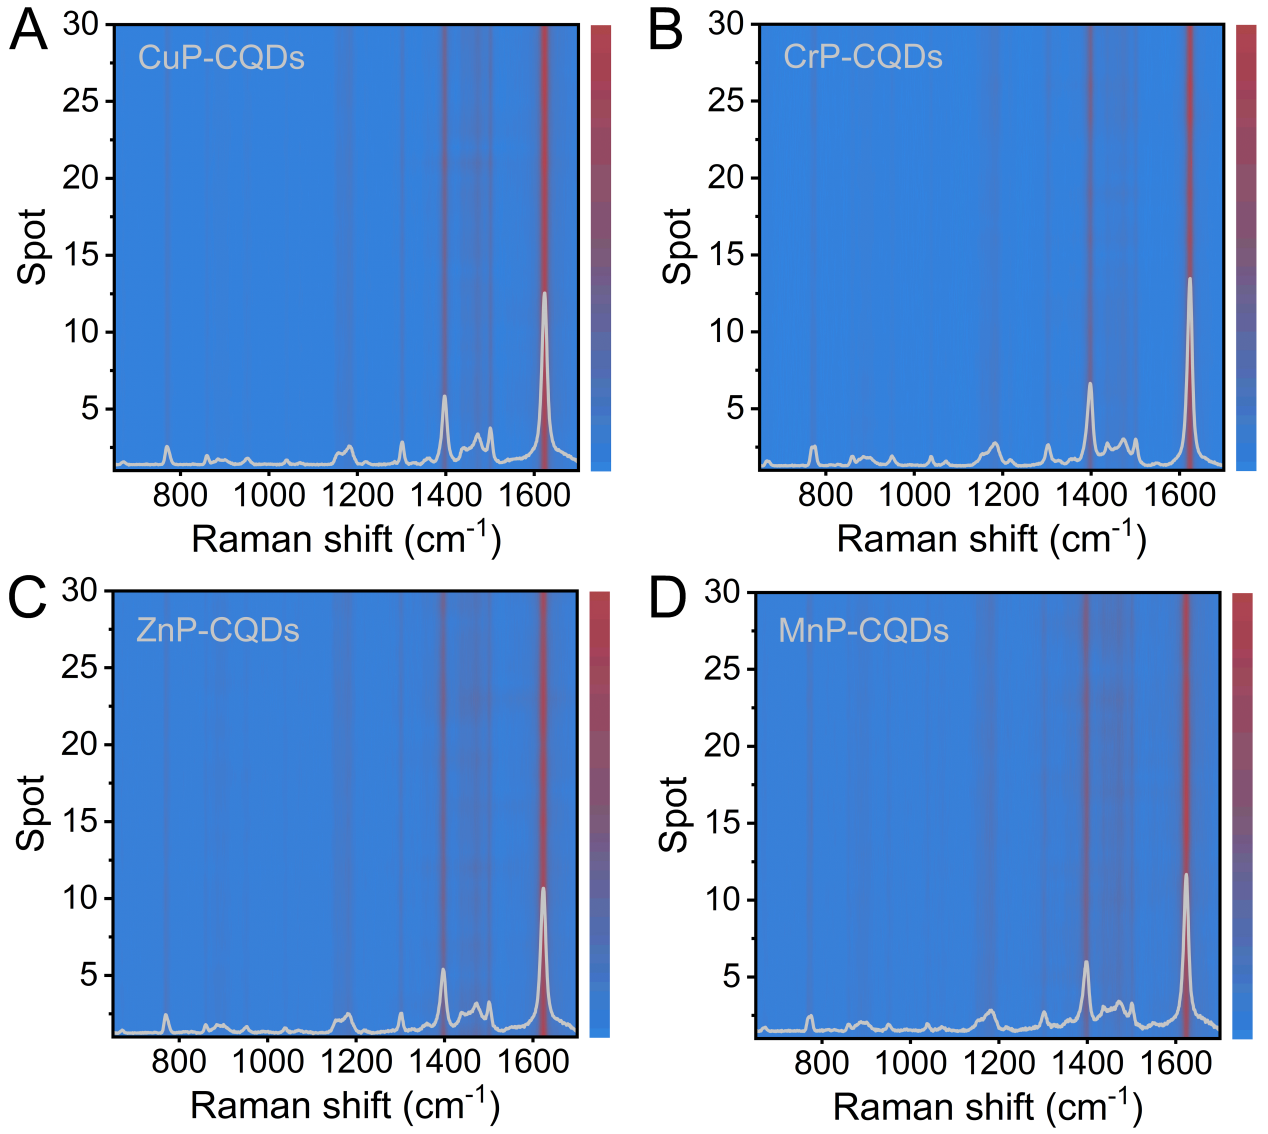


**Fig. S3 SERS reproducibility of other MPN-CQDs.** (A) CuP-CQDs, (B) CrP-CQDs, (C) ZnP-CQDs, and (D) MnP-CQDs. The SERS spectral maps of MB were constructed by plotting 30 random spectral lines.


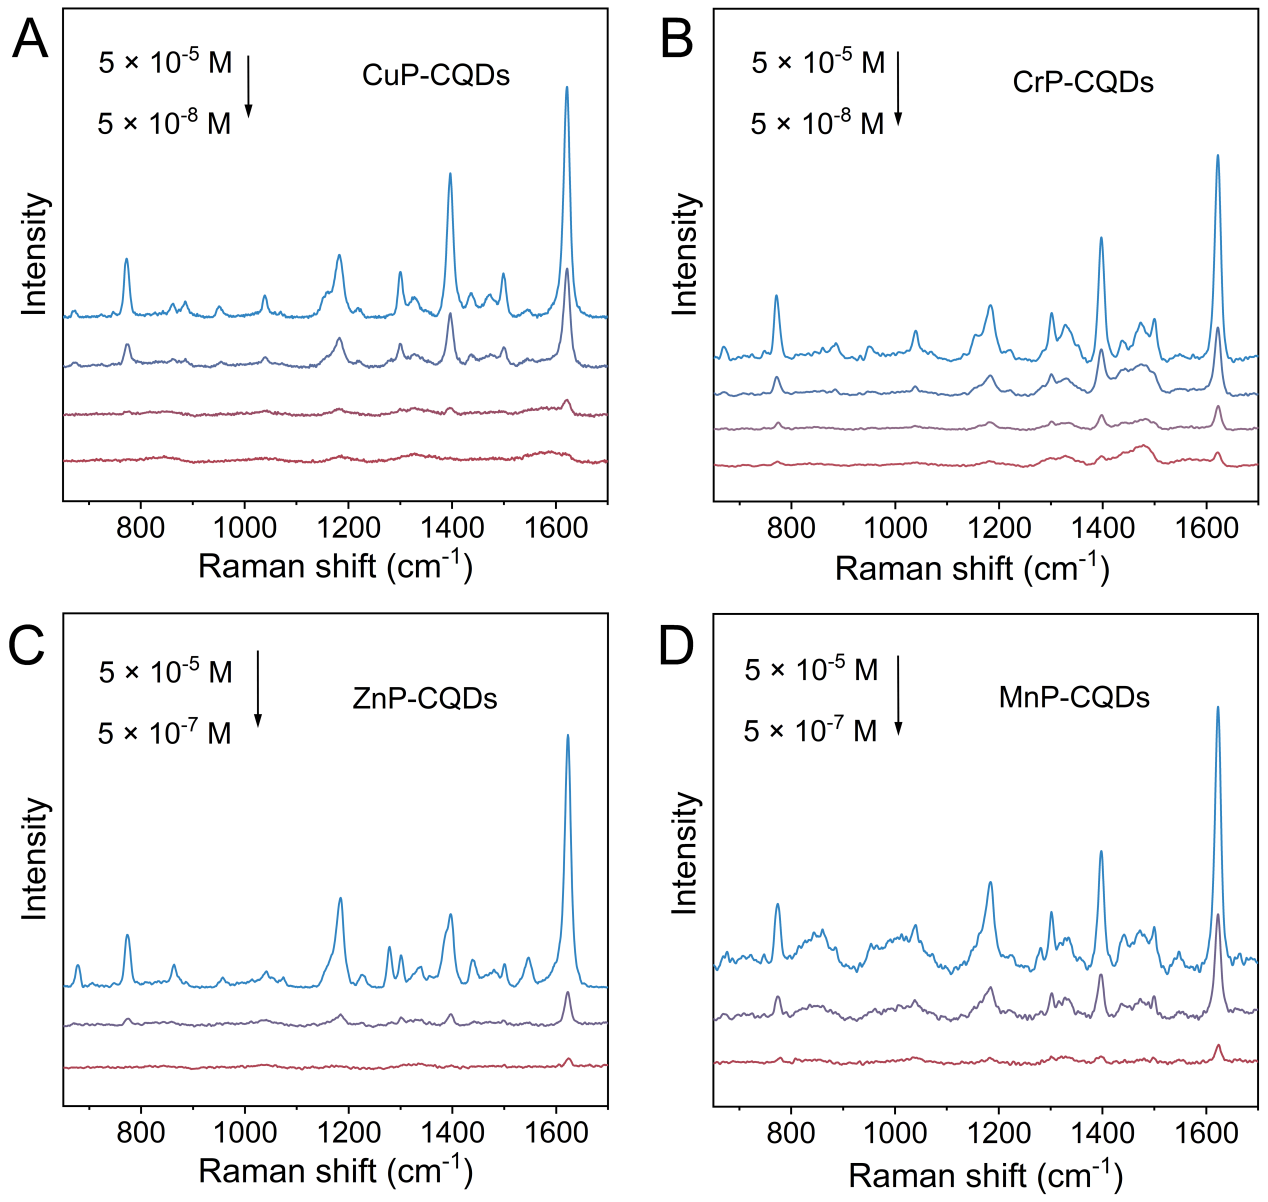


**Fig. S4 SERS performance of other MPN-CQDs under 785 nm laser excitation.** (A) CuP-CQDs, (B) CrP-CQDs, (C) ZnP-CQDs, and (D) MnP-CQDs.


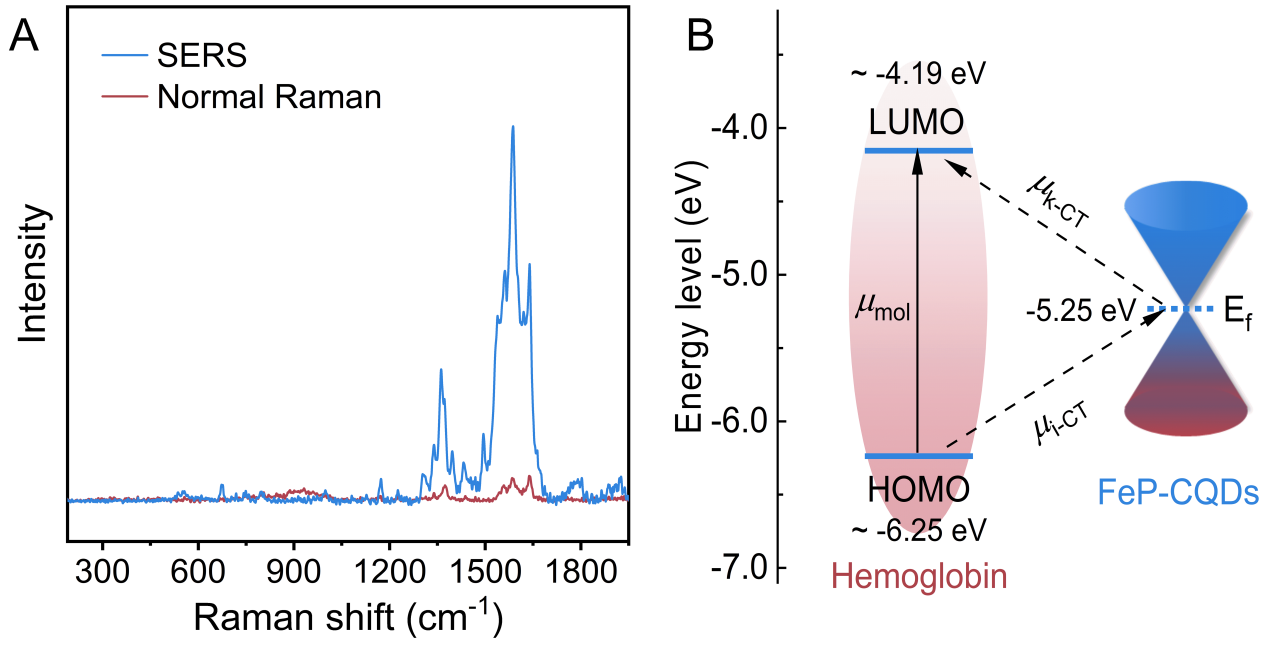


**Fig. S5 SERS activity of FeP-CQDs on bovine Hb.** (A) The Raman spectra of 1 mg/mL bovine Hb before and after deposited on FeP-CQDs under 514.5 nm laser excitation, respectively. (B) Schematic illustration of the charge transfer process between bovine Hb and FeP-CQDs.


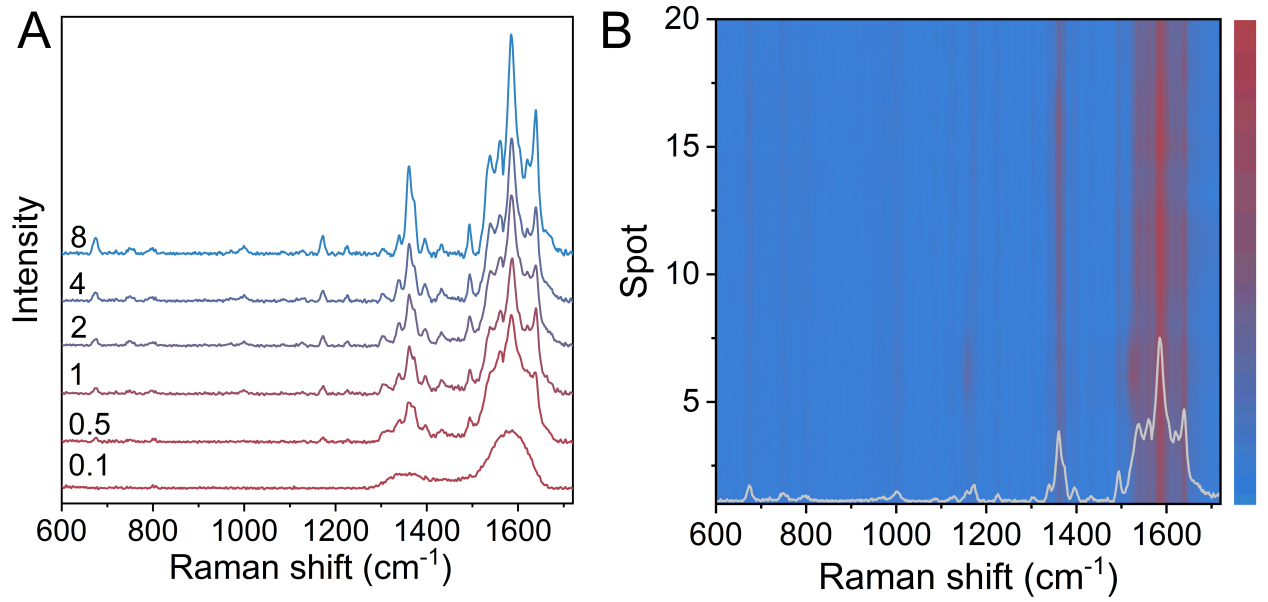


**Fig. S6 Detection of bovine Hb based on FeP-CQDs.** (A) Concentration-dependent SERS spectra of bovine Hb on FeP-CQDs under 514.5 nm laser. (B) SERS spectral map of bovine Hb plotted by 20 random spectral lines.


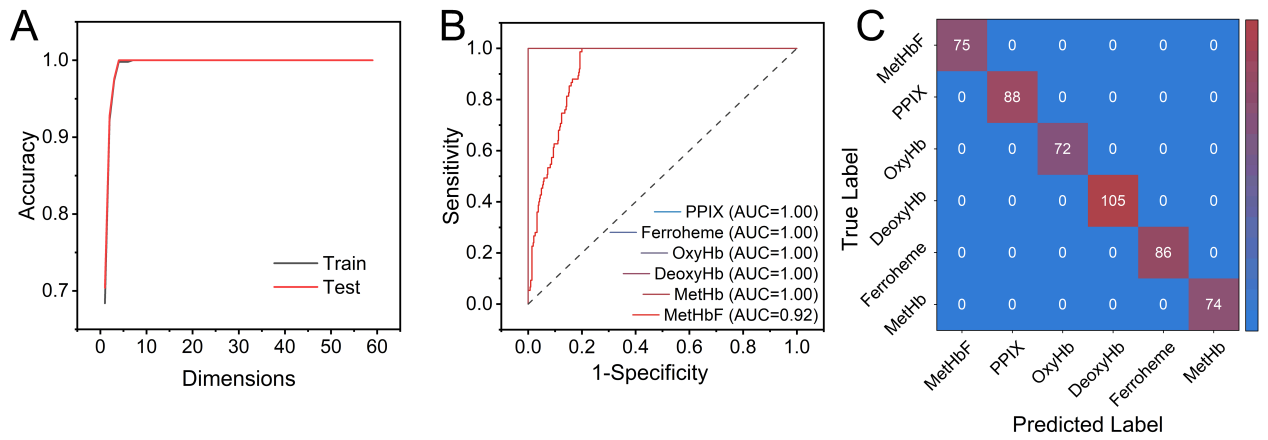


**Fig. S7 The outcomes of PCA-LDA algorithm using the training set.** (A) The accuracies of training and testing curves using PCA-LDA algorithm for the SERS data. Relationship between the output dimensions of PCA and the accuracy of the PCA - LDA classification model; (B) ROC curves and corresponding AUCs of the training set; (C) Confusion matrix of the training set.

Table S1 Tentative assignments of the SERS bands of bovine Hb induced by FeP-CQDs

| Raman shift (cm-1) | Reported results (cm-1) | | Band assignment |
| --- | --- | --- | --- |
| 1637(m) | Low spin: 1640-1644 | | *v*(CɑCm)asym |
| 1586(s) | 1583 | | *v*(CɑCm)asym |
| 1539(w) | 1544 | | *v*(CβCβ) |
| 1493(w) | 1501 | | *v*(CɑCm)sym |
| 1359(m) | Deoxy-Mb: 1355-1362 | | *v*(pyr half-ring)sym |
| 1170(w) | | 1169 | *v*(pyr half-ring)asym |
| 674(w) | | 674 | δ(pyr deform)sym |
